# Supplementary material
Source: PubMed Central journal article supplement (PMC1847778)
Supplement: NIHMS17803-supplement-01.pdf [file NIHMS17803-supplement-01.pdf]

## Supplemental Data

### Structural Investigation of the GImS Ribozyme

#### Bound to Its Catalytic Cofactor

Jesse C. Cochran, Sarah V. Lipchock, and Scott A. Strobel<sup>1,2</sup>

Table S1. Data Collection, Phase Determination, and Refinement Statistics

|                                          | Native              | 2mM Co(NH <sub>3</sub> ) <sup>6+</sup> | 1mM Co(NH <sub>3</sub> ) <sup>6+</sup> /IodoU | 5mM Ir(NH <sub>3</sub> ) <sup>6+</sup> /IodoU |
|------------------------------------------|---------------------|----------------------------------------|-----------------------------------------------|-----------------------------------------------|
| <b>Data Collection</b>                   |                     |                                        |                                               |                                               |
| Space group                              | P2 <sub>1</sub>     | P2 <sub>1</sub>                        | P2 <sub>1</sub>                               | P2 <sub>1</sub>                               |
| Cell dimensions                          |                     |                                        |                                               |                                               |
| a, b, c (Å)                              | 48.13, 234.2, 105.0 | 48.44, 231.3, 106.2                    | 48.99, 232.5, 106.5                           | 48.60, 230.6, 106.2                           |
| α, β, γ (°)                              | 90.00, 90.65, 90.00 | 90.00, 92.59, 90.00                    | 90.00, 92.20, 90.00                           | 90.00, 92.84, 90.00                           |
| Resolution (Å)                           | 39-2.50 (2.59-2.50) | 50-2.75 (2.85-2.75)                    | 50-2.75 (2.85-2.75)                           | 50-2.80 (2.90-2.80)                           |
| R <sub>sym</sub> (%) <sup>a</sup>        | 6.2 (>100)          | 13.8 (>100)                            | 13.8 (>100)                                   | 13.9 (>100)                                   |
| <I>/<σI> <sup>a</sup>                    | 23.2 (1.1)          | 12.2 (1.1)                             | 12.2 (1.1)                                    | 10.2 (1.0)                                    |
| Completeness (%) <sup>a</sup>            | 99.8 (100)          | 98.4 (95.9)                            | 98.4 (95.9)                                   | 99.8 (98.6)                                   |
| Redundancy <sup>a</sup>                  | 6.1 (5.9)           | 7.5 (7.1)                              | 5.1 (4.5)                                     | 7.3 (6.9)                                     |
| <b>MIR(AS) Phasing</b>                   |                     |                                        |                                               |                                               |
| No. Co(NH <sub>3</sub> ) <sup>6+</sup>   |                     | 14                                     | 14                                            |                                               |
| No. I                                    |                     |                                        | 4                                             | 4                                             |
| No. Ir(NH <sub>3</sub> ) <sup>6+</sup>   |                     |                                        |                                               | 36                                            |
| Phasing power                            |                     |                                        |                                               |                                               |
| Acentric <sup>a</sup>                    |                     |                                        | 0.436 (0.288)                                 | 0.947 (0.359)                                 |
| Centric <sup>a</sup>                     |                     |                                        | 0.336 (0.161)                                 | 0.729 (0.226)                                 |
| R <sub>collis</sub> <sup>a</sup>         |                     |                                        | 0.958 (1.386)                                 | 0.835 (1.231)                                 |
| Figure of merit <sup>a</sup>             |                     |                                        |                                               | 0.333 (0.100)                                 |
| <b>Refinement</b>                        |                     |                                        |                                               |                                               |
| Resolution (Å)                           | 35.0-2.50           |                                        |                                               |                                               |
| No. reflections <sup>b</sup>             | 80129 (3987)        |                                        |                                               |                                               |
| R <sub>work</sub> /R <sub>free</sub> (%) | 22.2 / 26.9         |                                        |                                               |                                               |
| No. atoms                                |                     |                                        |                                               |                                               |
| Protein                                  | 2908                |                                        |                                               |                                               |
| RNA                                      | 13080               |                                        |                                               |                                               |
| Ligand/Ion                               | 80                  |                                        |                                               |                                               |
| Water                                    | 207                 |                                        |                                               |                                               |
| Mean B-factors                           |                     |                                        |                                               |                                               |
| Protein                                  | 55.2                |                                        |                                               |                                               |
| RNA                                      | 57.7                |                                        |                                               |                                               |
| Ligand/Ion                               | 51.9                |                                        |                                               |                                               |
| Water                                    | 59.7                |                                        |                                               |                                               |
| R.m.s. deviations                        |                     |                                        |                                               |                                               |
| Bond lengths (Å)                         | 0.008               |                                        |                                               |                                               |
| Bond angles (°)                          | 1.562               |                                        |                                               |                                               |

<sup>a</sup>Values in parentheses are for the highest resolution shell. <sup>b</sup>Values in parentheses are for the cross-validation test set.
